# Supplementary material for: Functional Analysis of Four Terpene Synthases in Rose-Scented Pelargonium Cultivars (Pelargonium × hybridum) and Evolution of Scent in the Pelargonium Genus
Source: Front Plant Sci. 2018 Nov 2;9:1435. doi: 10.3389/fpls.2018.01435 (PMC6240891; doi:10.3389/fpls.2018.01435)
Supplement: Supplementary file 6 [file Table_4.XLSX]

## Sheet: DSM-sup3
terp	P. rosat bourbon	P. rosat grasse	P. citronellum	P. australe	P. cotyledonis	P. echinatum	P. exstipulatum	P. fulgidum	P. x hortorum	P. tetragonum	P. transvaalense
Tricyclene	0	0	0	0	0	0	6.90159	0	6.30021	0	0
Alpha thuyene	0	0	0.17	0	0	0	0	0	0	0	0
Alpha pinene	0.61	0.44	0	0	0	3.93128	41.2884	0	1.5462	1.94135	0
Camphene	0	0	0	0	0	0	2.18385	0	0.733097	0	0
Sabinène	0	0	0.2	0	0	0	4.28884	0	0	0	0
Beta pinene	0	0.14	0	0	0	0	14.5144	0	0.577686	5.98117	0
Myrcene	0	0	0	0	0	0	1.11424	10.2425	8.16116	0	0
Alpha phellandrene	0.28	0.09	0	0	0	21.7988	0	0	0.559812	49.5123	0
Para cymene	0	0	0.81	0	0	0	0	0	0.776234	0	0
Limonene	0.11	0.02	0	0	0	0	0	0	1.18161	0	0
Beta phellandrene	0.25	0	0	0	0	0	0	7.16668	0	0	0
1.8-cineole	0	0	0	0	0	0	14.2432	0	0	0	0
Cis beta ocimene	0.24	0	0	0	0	13.4196	0	0	1.04404	7.86693	0
Trans beta ocimene	0.08	0	0	0	0	9.47612	0	5.77967	0	0	0
GAMMA terpinene	0	0	0.65	0	0	0	0	0	0	2.48641	0
Linalool L	0.2	0.19	1.93	0	0	0	0	0	1.23244	0	0
Cis-oxide rose	0	0.4	0	0	0	0	0	0	0	0	0
Trans oxide rose	0	0.17	0	0	0	0	0	0	0	0	0
Allo ocimene	0	0	0	0	0	0	0	0	0.464841	0	0
Citronellal	0.31	0.26	0	0	0	0	0	0	0	0	0
Menthone	0.04	0.21	0	0	0	0	0	0	0.576268	0	0
Isomenthone	9.77	8.48	0	0	0	0	0	0	73.1162	0	0
Nerol	0	0	0.81	0	0	0	0	0	0	0	0
Citronellol	16.8	21.9	0	0	0	0	0	0	0.695807	0	0
Neral	0.44	0	25.08	0	0	0	0	0	0	4.59953	0
Piperitone	0	0	0	0	0	0	0	0	0.695807	0	0
Geraniol	24.3	25.6	2.97	0	0	0	0	0	0	0	0
Geranial	2.87	1.84	63.65	0	0	0	0	0	0	10.9023	0
Citronellyl formate	8	6.69	0	0	0	0	0	0	0	0	0
Geranyl formate	8.1	4.83	0	0	0	0	0	0	0	0	0
Bicycloelemene	0	0	0.333449	0	0	0	0	4.57707	0	0	0
Alpha copaene	0.22	0.42	0.183101	0	0	0	0	0	0	2.79662	0
Geranyl acetate	0.42	0.46	0	0	0	0	0	0	0	0	0
Beta elemene	0.52	0.27	0	0	0	0	0	9.36817	0	0	0
Beta caryophyllene	1.45	0.99	0	0	0	21.53	8.89058	0	0	0	0
6.9 guaiadiene	7.04	0.52	0	0	0	0	0	0	0	0	0
Gamma-elemene	0	0	0	0	0	15.4992	0	22.1501	0	0	0
Alpha humulene	0	0	0	0	0	5.02991	0.623625	0	0	0	0
Alloaromadendrene	0	0	0	0	0	0	0	4.15924	0	0	0
Alpha-amorphene	0	0	0	0	0	0	0	0	0	2.79662	0
Germacrene D	2.35	3.25	1.49074	0	0	0	0.357075	3.246	2.00802	3.42526	0
Beta selinene	0	0	0	0	0	0	0	15.6952	0	0	0
Bicyclogermacrene	0	0	0.873959	0	0	0	0	17.6153	0.330592	0	0
Zingiberene	0	0	0	0	0	5.02991	0	0	0	0	0
Delta cadinene	0	0	0.342297	0	0	0	1.99312	0	0	7.69159	0
Nerolidol	0	0	0.498648	0	0	4.28525	0	0	0	0	0
Caryophyllene oxide	0	0	0	0	0	0	3.60112	0	0	0	0
10-gamma-épi eudes	0	6.24	0	0	0	0	0	0	0	0	0
Geranyl tigliate	1.83	1.7	0	0	0	0	0	0	0	0	0
Supplementary Table 4: Terpene composition expressed as percentage of each compound in 9 pelargonium species from which RNA-Seq data are publically available.
